# Supplementary material for: MicroRNA-30a increases tight junction protein expression to suppress the epithelial-mesenchymal transition and metastasis by targeting Slug in breast cancer
Source: PubMed Central journal article supplement (PMC4941328; doi:10.18632/oncotarget.7656), 2016-02-24
Supplement: oncotarget-07-16462-s001.pdf [file oncotarget-07-16462-s001.pdf]

## MicroRNA-30a increases tight junction protein expression to suppress the epithelial-mesenchymal transition and metastasis by targeting Slug in breast cancer

### Supplementary Materials

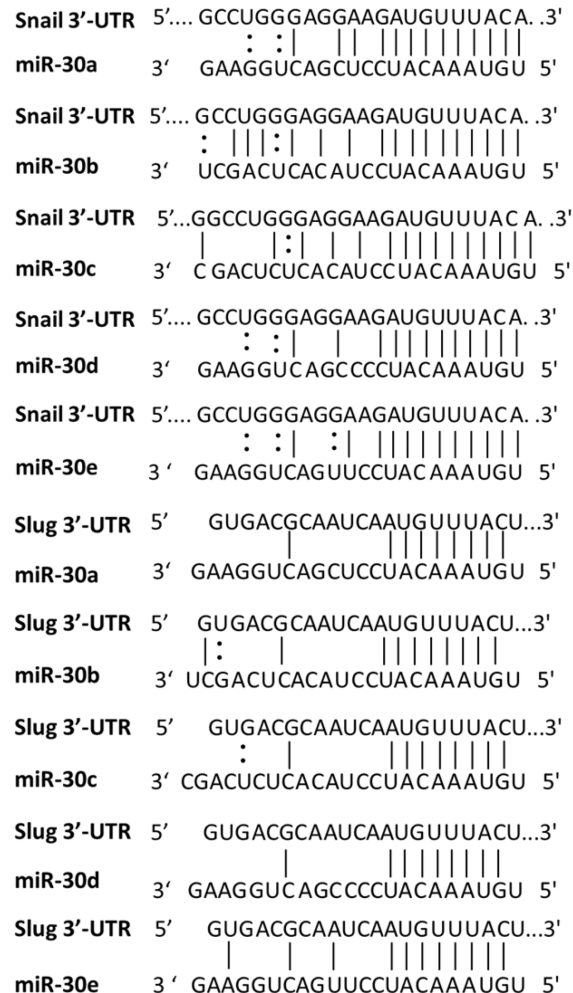

**Supplementary Figure S1: Prediction of the sequences within Snail mRNAs targeted by miR-30 family members.** Computational algorithm results show that miR-30 family members share the same seed sequence, which targets the 3'-UTRs of *Snail* and *Slug*.

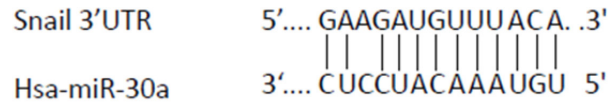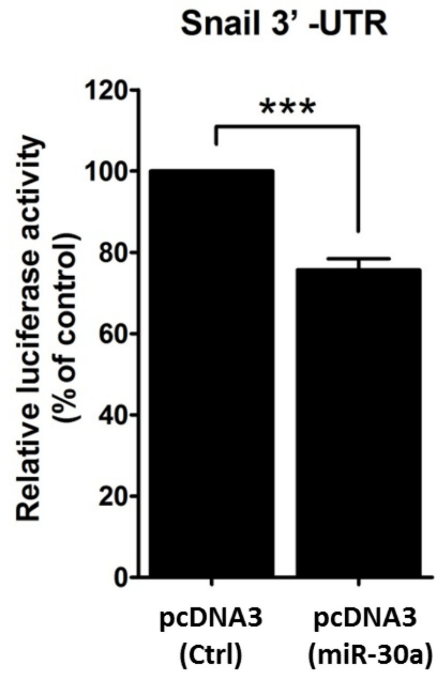

**Supplementary Figure S2: *Snail* as a downstream target of miR-30a.** Three algorithms, miRanda, miRWalk, and TargetScan, were used to identify putative interaction sites between *Snail* 3'-UTR and miR-30a. The consensus binding site in the *Snail* mRNA is shown. Expression of miR-30a reduced the activity of the luciferase gene fused to the *Snail* 3'-UTR by > 20%, supporting the notion that miR-30a downregulates Snail levels by targeting the 3'-UTR of the mRNA. The control (Ctrl) consisted of the *Snail* 3'-UTR construct along with pcDNA3.

**Supplementary Table S1: Immunohistochemical analysis of slug, fascin, and claudins stratified by miR-30a expression levels in association with clinicopathological features of breast cancer**

| Cliniopathological features | miR-30a expression (T/N ratio) <sup>a</sup> | Slug | Fascin | CLDN-1 | CLDN-2 | CLDN-3 |
|-----------------------------|---------------------------------------------|------|--------|--------|--------|--------|
| pT1, N1, Stage I            | > 0.5                                       | +/-  | +      | ++     | +++    | +++    |
| pT1, N0, Stage IIa          | > 0.5                                       | -    | -      | +++    | ++     | +++    |
| pT2, N1, Stage IIb          | < 0.5                                       | +++  | ++     | -      | +      | -      |
| pT2, N1, Stage IIb          | < 0.5                                       | +++  | ++     | -      | -      | +/-    |
| pT2, N2, Stage IIIa         | < 0.5                                       | +++  | ++     | +      | +/-    | -      |
| pT2, N2, Stage IIIa         | < 0.1                                       | +++  | +++    | +      | -      | +      |
| pT2, N2, Stage IV           | < 0.1                                       | +++  | +++    | +      | +/-    | -      |
| pT4, N2, Stage IIIb         | < 0.1                                       | ++   | ++     | +      | -      | +      |
| pT4, N2, Stage IIIb         | < 0.1                                       | +++  | +++    | -      | -      | +/-    |
| pT1, M1, Stage IV           | < 0.1                                       | +++  | +++    | -      | -      | -      |

<sup>a</sup>Detailed quantitation for expression level of miR-30a in tumor tissues was described elsewhere [10]. The expression status of the miR-30a was defined by comparing miR-30a expression in tumor cells and adjacent non-tumor cells captured from the primary tumor site of the patient as described accordingly. Immunohistochemical staining and scoring system for the paraffin-embedded breast cancer tissue samples from patients were performed and assessed as described in Material and method. Tumor classification was referred to sixth edition of the AJCC Cancer Staging Manual [40].

**Supplementary Table S2: Oligonucleotide primers used in this study**

| Gene                        | Sequence |                                                        |
|-----------------------------|----------|--------------------------------------------------------|
| <b>Plasmid construction</b> |          |                                                        |
| plemiR-30a                  | F:       | 5'-CCGCTCGAGTCCATGAGCCTTCTTA 3'                        |
|                             | R:       | 5'-CGACGCGTTATTGCCCTACTACGC 3'                         |
| pcDNA3/miR-30a              | F:       | 5'-CCAAGCTTCCATGAGCCTTCTTA 3'                          |
|                             | R:       | 5'-CGGAATTCTATTGCCCTACTACGC 3'                         |
| Slug 3'-UTR/wt              | F:       | 5'-CCGCTCTAGATGGTTTGGTACTAATCATGAAG 3'                 |
|                             | R:       | 5'-TCCCAGTCTAGAACGCAATCAATGTTTACTCGAA 3'               |
| Slug 3'-UTR/mut1            | F:       | 5'-GTGACGCAATCA <u>AA</u> CAAAATGTCGAACAGAATGCATTTC 3' |
|                             | R:       | 5'-GAAATGCATTCTGTT <u>CGAC</u> ATTTGTTTGATTGCGTCAC 3'  |
| Slug 3'-UTR/mut2            | F:       | 5'-CAATGTAAATTT <u>GCGGTG</u> CTTTTATATGATTG 3'        |
|                             | R:       | 5'-CAATCATATAAAAAGC <u>ACCG</u> CAAATTTACATTG 3'       |
| <b>Chromatin IP</b>         |          |                                                        |
| CLDN1 (+171/+189)           | F:       | 5'-ATCCAGACTCCAGCGCCGCC 3'                             |
|                             | R:       | 5'-GACTCGCTCGGGCGCCCGCG 3'                             |
| CLDN2 (-803/-717)           | F:       | 5'-TTCAAAGAGAGGCAGTGTA AAC 3'                          |
|                             | R:       | 5'-TGAGAACCTGTGGCTTCTCTACT 3'                          |
| CLDN3 (-462/-363)           | F:       | 5'-ACCGCCGGACTCAGGCTGAGCC 3'                           |
|                             | R:       | 5'-GACACGGCTTCTCTCTCCTCACC 3'                          |

The primer sequences with mutated nucleotides underlined are the sequences of the mismatch primers used to generate the different Slug 3'-UTR mutants.
